# Supplementary figures and images for: Molecular typing of clinical, colonizing, and environmental isolates of Staphylococcus aureus and comparison with World isolates
Source: Research Square preprint supplement (doi:10.21203/rs.3.rs-6712641/v1), 2025-06-04

**Fig S2: eBURST Analysis of Indian isolates**


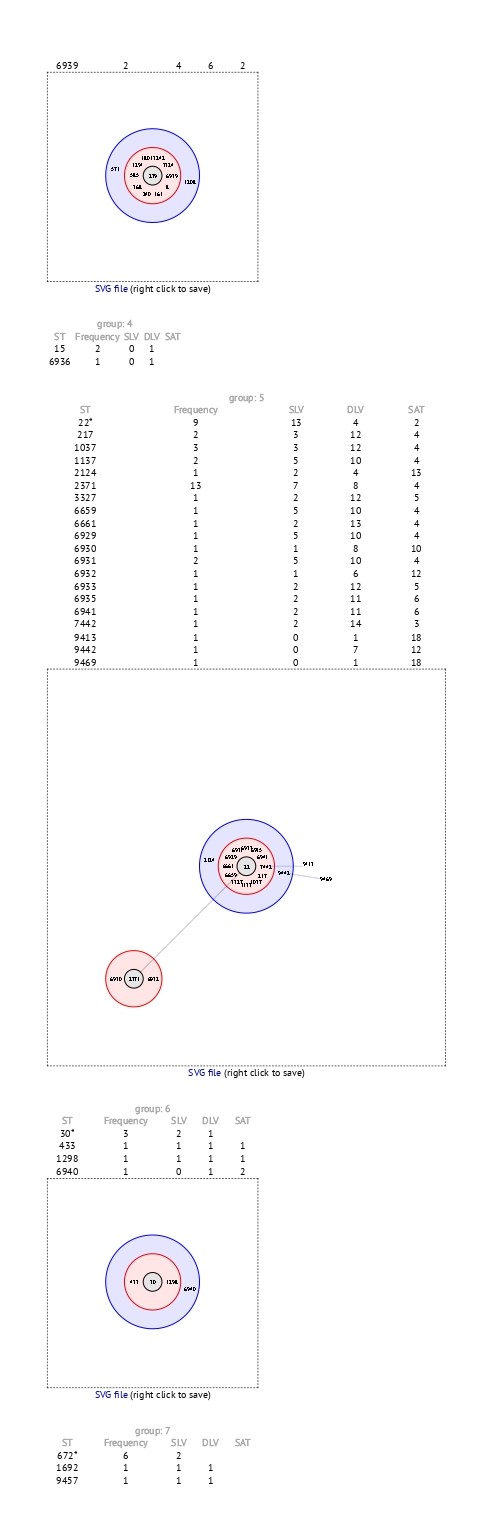


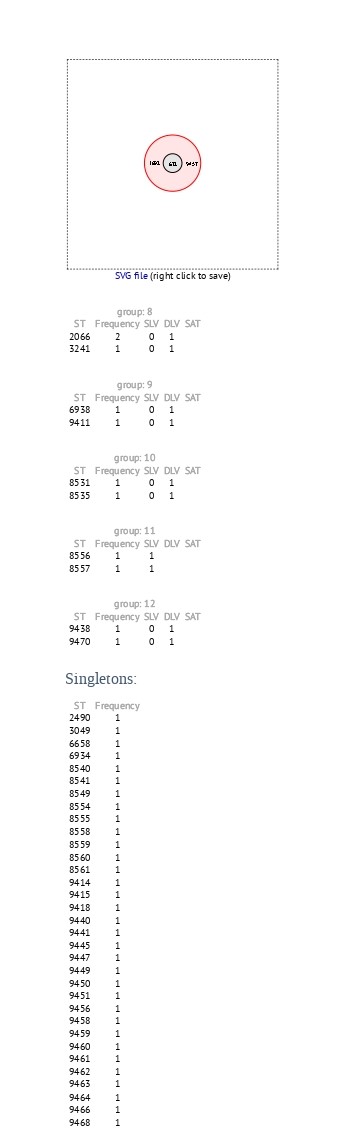

Supplement: Supplementary file 1 [file c61bcb38a405343b900885b1.docx]

**Fig S1:** eBURST Analysis of study isolates

**
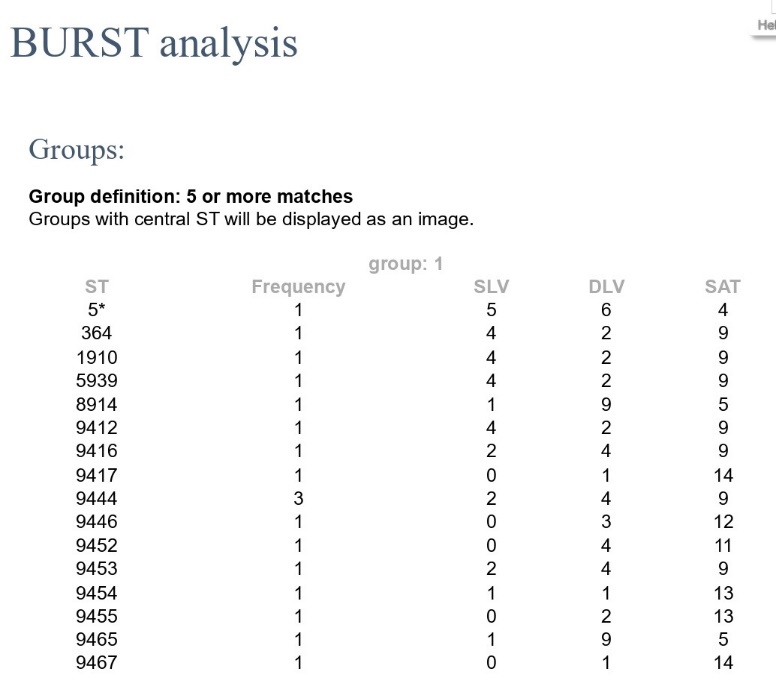
**

**
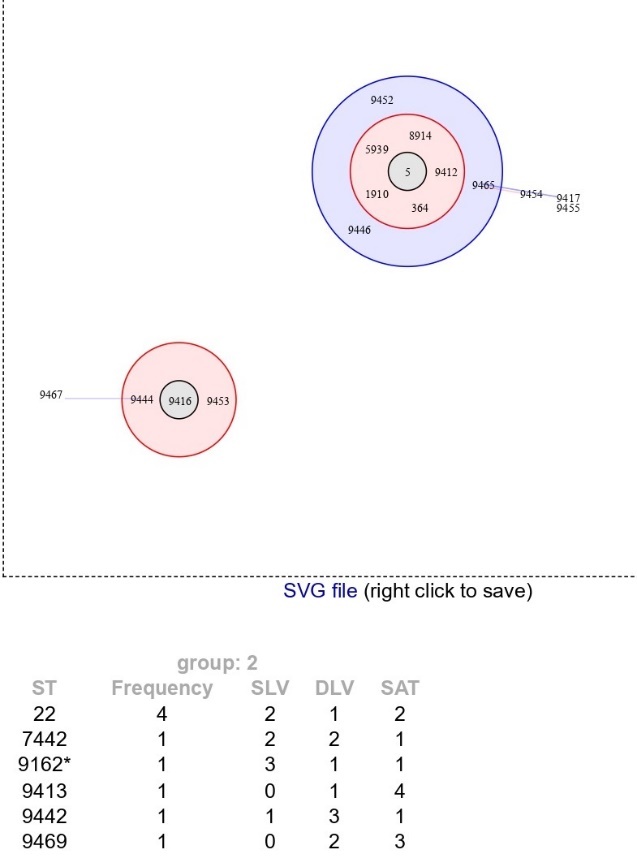
**

**
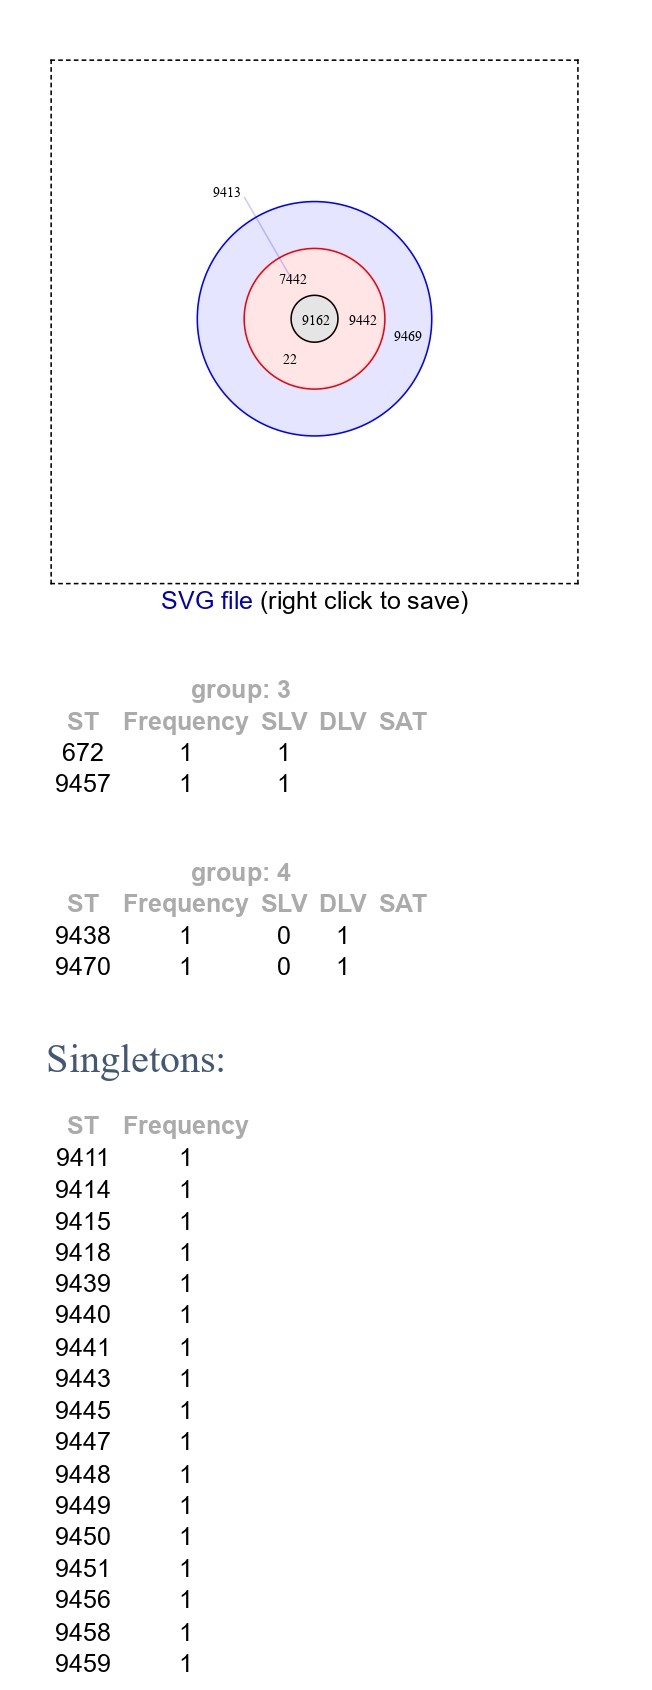
**

**
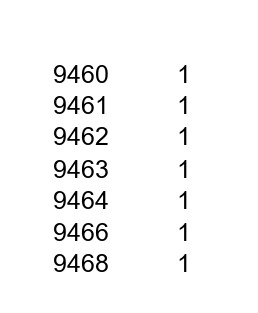
**

Supplement: Supplementary file 2 [file e5c725d500e913caf9e2384d.docx]
